# Supplementary material for: The effects of electronic coupling between capping molecules and quantum dots on the light absorption and emission of octyl, styryl, and 4-ethynylstyryl terminated silicon quantum dots
Source: Royal Society of Chemistry journal article supplement (doi:10.1039/c4cp02657h), 2014-01-01
Supplement: c4cp02657h1.pdf [file c4cp02657h1.pdf]

**The Effects of Electronic Coupling between Capping Molecular and Quantum Dot on the Light Absorption and Emission in Octyl, Styryl, and 4-Ethynylstyryl Terminated Silicon Quantum Dots**

Thu-Huong Le and Hyun-Dam Jeong\*

*Department of Chemistry, Chonnam National University, Gwangju, 500-757, Republic of Korea.*

## Experimental.

Hydrogen-terminated silicon quantum dots (H-Si QDs) were synthesized using the mini-emulsion method reported by Tilley et al.,<sup>1</sup> with the modification that the remaining reducing agent  $\text{LiAlH}_4$  was quenched by  $\text{CuSO}_4$  instead of methanol.<sup>2</sup> A mixture of  $\text{SiCl}_4$  (1.33 g, 7.8 mmol) and tetraoctylammonium bromide (TOAB, 13.5 g) in anhydrous toluene (900 ml) was sonicated for 90 minutes. 13.5 of a  $\text{LiAlH}_4$  solution (2 M in THF, 27 mmol) were added to reduce the  $\text{SiCl}_4$  to H-Si QD and the reaction was kept under sonication for 3 hours. The excess  $\text{LiAlH}_4$  was quenched by dried  $\text{CuSO}_4$  (21 g, 84.6 mmol). Then, the mixture solution was divided to 3 flasks. The first flask, 10 ml of 1-octene and 0.3 ml of a 0.05 M  $\text{H}_2\text{PtCl}_6$  solution in methanol were added. The second flask, 10 ml of phenylacetylene and 0.3 ml of a 0.05 M  $\text{H}_2\text{PtCl}_6$  solution in methanol were added. The third flask, 0.5 g of 1,4-diethynylbenzene in anhydrous toluene and 0.3 ml of a 0.05 M  $\text{H}_2\text{PtCl}_6$  solution in methanol were added. These functionalization steps were carried out for 2 days at room temperature under Ar atmosphere.

For purification of octyl Si QD, all solvent were removed at about 40°C under reduced pressure to obtain dried solid. The octyl Si QD was collected by hexane and the hexane solution were extracted with N-methylformamide (3 times), water (3 times), brine (2 times) and dried over anhydrous  $\text{MgSO}_4$ . Finally, we obtained octyl Si QD as white resin.

For purification of styryl Si QD, all solvent were removed at about 40°C under reduced pressure to obtain dried solid. The styryl Si QD was collected by hexane and the hexane solution was extracted with N-methylformamide (3 times), AgNO<sub>3</sub> in NH<sub>3</sub> (3 times), water (3 times), and brine (2 times) and dried over anhydrous MgSO<sub>4</sub>. Finally, we obtained styryl Si QD as yellow resin.

For purification of 4-ethynylstyryl Si QD, all solvent were removed at about 40°C under reduced pressure to obtain dried solid. The 4-ethynylstyryl Si QD was collected by hexane and the hexane solvent was removed at about 40°C under reduced pressure to obtain dried solid. The remaining capping molecules and surfactant were separated by the column chromatography of silica-gel (40-63 μm) using system solvent (hexane: dichloromethane). Finally, the product was obtained as yellow solid.

## **Results and Discussion.**

The chemical structure of octyl Si QD was confirmed by FT-IR and <sup>1</sup>H NMR spectroscopy in Figure S1a and Figure S2a. Alkyl group on surface octyl Si QD including the asymmetric stretching, symmetric stretching, and in plane bending or scissoring of the C-CH<sub>2</sub>- asymmetric, C-CH<sub>3</sub> symmetric, respectively were obtained at 2917.1 cm<sup>-1</sup>, 2851.8cm<sup>-1</sup>.<sup>3</sup> The peak at 1460.7 cm<sup>-1</sup> is broadened by the inclusion of the C-CH<sub>2</sub>. The peaks between 1000-1100 cm<sup>-1</sup> corresponded to Si-OR stretching vibrations and indicated that the oxidation of Si QD had occurred. In the <sup>1</sup>H-NMR spectrum of

octyl Si QD (Figure S2b), two groups proton,  $-\text{CH}_2$  and  $\text{CH}_3$  were assigned at  $\sim 1.3$  and  $0.9$  ppm, respectively.<sup>2</sup> The relative proton integral ratio of  $(-\text{CH}_2)$  and  $(-\text{CH}_3)$  (1:0.21) shows that the majority of the product is the octyl terminated Si QDs.

For styryl Si QD sample, the styryl group ( $\text{C}_8\text{H}_6-$ ) was confirmed by FT-IR and  $^1\text{H}$  NMR spectroscopy in Figure S1b and Figure S2b. The peaks at  $2917.1\text{ cm}^{-1}$ ,  $2851.8\text{ cm}^{-1}$  in Figure S1b were due to the  $\text{sp}^3-\text{CH}_2$ , or  $\text{sp}^3-\text{CH}_3$  from remaining hexane solvent. We observed peak at  $3027\text{ cm}^{-1}$  attributed to vibration  $\text{sp}^2$ -hybridized C-H stretching modes. The peaks at  $1605.4\text{ cm}^{-1}$  are attributed to the C=C vibration.<sup>4</sup> The peaks at  $1600\text{-}1700\text{ cm}^{-1}$  were attributed to the overtone of aromatic ring of capping. The in-plane C-H bending of the phenyl ring were obtained at about  $1024$  and  $1074\text{ cm}^{-1}$ . The structure of styryl Si QD was further confirmed by  $^1\text{H}$ -NMR spectrum, as shown in Figure S2b. Chemical shift of proton in the phenyl ring were in the range from  $6.8$  to  $8$  ppm. Two protons,  $\text{Si}-\text{CH}=\text{C}$  and  $-\text{CH}=\text{C}-$ , were in the range from  $5.5$  to  $6.2$  ppm.<sup>5</sup> Two peaks, marked by (\*) in Figure S2b, whose chemical shifts were  $0.89$ ,  $1.25$  ppm may be arisen from remaining hexane.

For 4-ethynylstyryl Si QD sample, the 4-ethynylstyryl group was confirmed by FT-IR and  $^1\text{H}$  NMR spectroscopy in Figure S1c and Figure S2c. The peak at  $3284.9\text{ cm}^{-1}$  was attributed to the  $\equiv\text{C}-\text{H}$  stretching band. The vibration at  $2104\text{ cm}^{-1}$  indicated the presence of  $\text{C}\equiv\text{C}$  stretching band. The peaks at  $1600\text{-}1700\text{ cm}^{-1}$  were attributed to the overtone of aromatic ring of capping. The key peak at  $1605.4\text{ cm}^{-1}$  (4-ethynylstyryl Si

QD or Styryl Si QD) were assigned to the C=C bond in conjugation with Si atoms on the QD surface (Si-C=C-, see the chemical structures shown in Scheme 1). This peak was red-shifted by 40 cm<sup>-1</sup> from 1640 cm<sup>-1</sup> in typical alkenes to about 1605.4 cm<sup>-1</sup> due to  $\sigma$ - $\pi$  conjugation between the  $\sigma$  orbital of the Si atom and the  $\pi$  orbital of vinyl group.<sup>4</sup> The <sup>1</sup>H-NMR spectrum (Fig. S2c) of 4-ethynylstyryl Si QD, we observe multiple signals characteristic for proton of phenyl group in the range 6.7-8 ppm. Two protons, Si-CH=C (1) and -CH=C- (2), were obtained at ~5.0 and 5.8 ppm, respectively. The free functional group (-C≡C-H) of 4-ethynylstyryl Si QD can also get signal with centre at 3.1 ppm. Four peaks, marked by (\*) of 4-ethynylstyryl Si QD in Figure S2, whose chemical shifts were 0.89, 1.25, 1.56, and 2 ppm may be arisen from remaining hexane or toluene solvent.

The Time-resolved photoluminescent results were best fitted by a three component exponential equation:  $I = A_1 \exp(-t/\tau_1) + A_2 \exp(-t/\tau_2) + A_3 \exp(-t/\tau_3)$ , where  $A_{1,2,3}$  and  $\tau_{1,2,3}$  are the amplitude and lifetime of each component, respectively.

- Average lifetime was calculated from equation:

$$\tau_{aver} = \frac{A_1 \tau_1^2 + A_2 \tau_2^2 + A_3 \tau_3^2}{A_1 \tau_1 + A_2 \tau_2 + A_3 \tau_3}$$

- Radiative transition rate is calculated from equation:

$$\square \quad k_f = \frac{\Phi}{\tau_{aver}}$$

Where  $\Phi$  is the average quantum yield of Si QDs measured at 325 excitation by comparison with quinine sulfate whose quantum yield is 55 %.

The fitting parameter, calculated average lifetime are summarized in below.

| Si QD            | A <sub>1</sub> | $\tau_1$ (ns) | A <sub>2</sub> | $\tau_2$ (ns) | A <sub>3</sub> | $\tau_3$ (ns) | $\tau_{aver}$ |
|------------------|----------------|---------------|----------------|---------------|----------------|---------------|---------------|
| octyl-           | 0.23           | 8.41          | 0.89           | 2.19          | 0.92           | 0.84          | 4.59          |
| styryl-          | 0.49           | 4.92          | 8.37           | 1.72          | 4.29           | 0.53          | 1.99          |
| 4-ethynylstyryl- | 0.12           | 3.73          | 3.38           | 1.15          | 13.31          | 0.55          | 0.88          |

In order to correlate the change in optical gaps of Si QD with extending conjugated capping molecules compared with UV-vis absorption and PL results, we first model the Si QD as a typical core-shell structure and then calculate the carrier's probability at capping layer of octyl Si QD, styryl Si QD, and 4-ethynylstyryl Si QD. The structures of the Si QD core (regarded as H-Si QD) and the shelling molecule are shown in Figure S5. To calculate the probability of carriers at the capping layer, we used a very simple particle in a box model, as illustrated in Figure S5, in which  $r$  is the radius of the Si QD core, set to 0.9 nm,  $t$  is the barrier thickness assumed to be the length of the shelling molecules, as inserted in Figure S5;  $V_{Se}$  and  $V_{Sh}$  are the barrier heights for the electron and hole, respectively. DFT-B3LYP calculations were conducted to calculate the orbital energies of the Si QD core (regarded as H-Si QD) and the shelling molecule, hence  $V_{Se}$ ,  $V_{Sh}$ , and  $t$  values, as presented in Figure 5. The one-dimensional (x axis) Schrödinger equation for the particle in a box is:

$$\frac{d^2\psi}{dx^2} + \frac{8\pi^2m^*}{h^2}(V_{(x)} - E)\psi = 0 \quad \text{where} \quad \begin{cases} V_{(x)} = \infty (|x| \geq t+r) \\ V_{(x)} = V_s (r \leq |x| \leq t+r) \\ V_{(x)} = 0 (|x| \leq r) \end{cases}$$

The probability densities ( $|\Psi|^2$ ) finding the electron and the hole along x axis were solved numerically, using the Numerov method. The probability percentage of the electron or the hole in the shelling layer is obtained by integrating the  $|\Psi|^2$  function in the shelling regions.

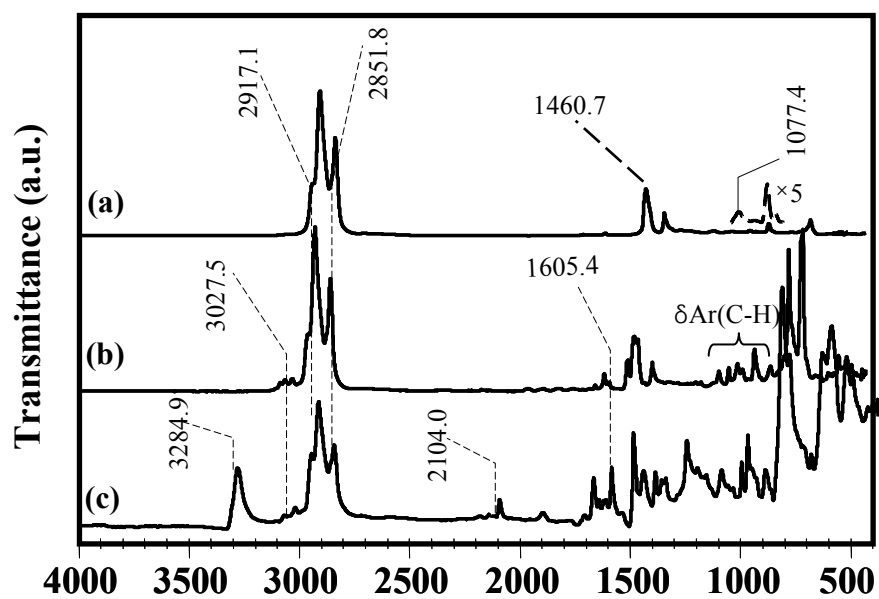

**Figure S1.** FT-IR spectra of the octyl Si QDs (a), styryl Si QDs (b), and 4-ethynylstyryl Si QDs (c).



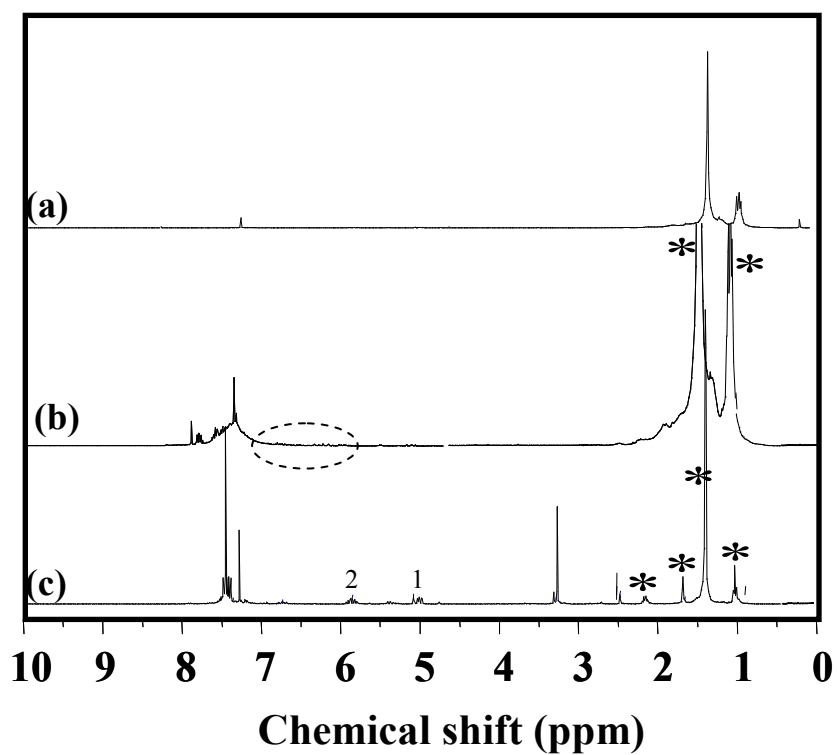

**Figure S2.** <sup>1</sup>H-NMR spectra of the octyl Si QDs (a), styryl Si QDs (b), and 4-ethynylstyryl Si QDs (c).

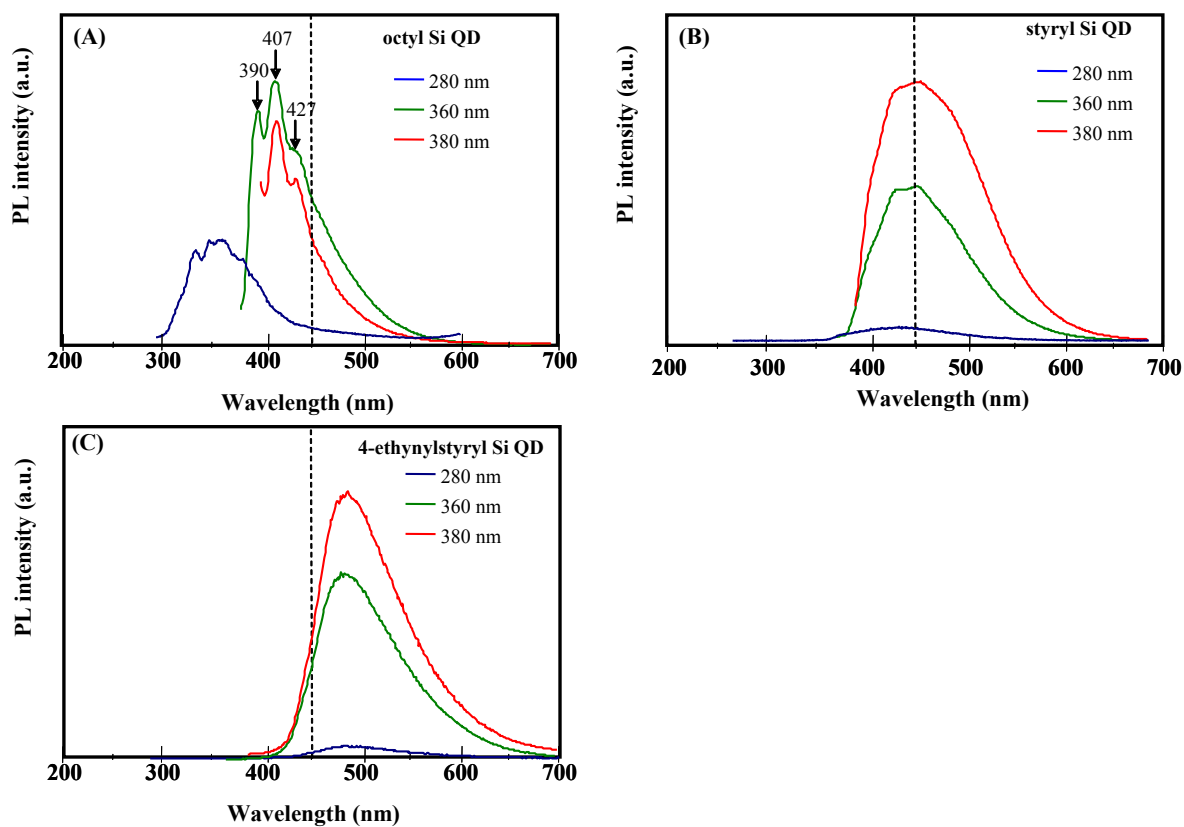

**Figure S3.** PL spectra of the as-prepared Si QD samples: A) octyl Si QD, B) styryl Si QDs, and C) 4-ethynylstyryl Si QDs recorded under excitation at different wavelengths.

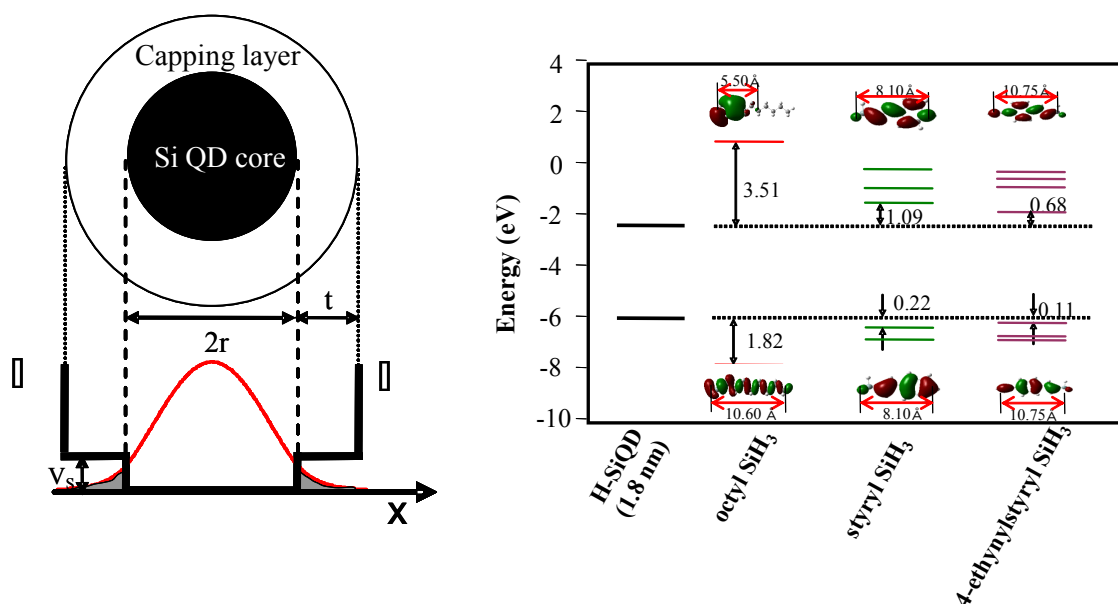

**Figure S5.** The “particle in a box” model for Si QDs with different capping molecules in which the Si QD core, assumed to be H-Si QD of the same size, is the well and the well barrier is composed of shelling molecules as inserted structures.

## References

1. R. D. Tilley, J. H. Warner, K. Yamamoto, I. Matsui, and H. Fujimori, *Chem. Commun.*, 2005, **14**, 1833.
2. X. D. Mai, D. T. Dao, J. Sohee, and D. J. Hyun, *Chem. Asian J.*, 2013, **8**, 653-664.
3. C. S. Yang, R. A. Bley, S. M. Kauzlarich, H. W. H. Lee, G. R. Delgado, *J. Am. Chem. Soc.*, 1999, **121**, 5191-5195.
4. J. M. Buriak, M. P. Stewart, T. W. Geders, M. J. Allen, H. C. Choi, J. Smith, D. Raftery, L. T. Canham, *J. Am. Chem. Soc.*, 1999, **121**, 11491.
5. O. Mukbaniani, T. Tatrishvili, G. Titvinidze, N. Mukbaniani, L. Lezhava, N. Gogesashvili, *J. Appl. Polym. Sci.* 2006, **100**, 2511.
